# Supplementary material for: Sustainable synthesis of diethyl carbonate from carbon dioxide and ethanol featuring acetals as regenerable dehydrating agents
Source: Royal Society of Chemistry journal article supplement (doi:10.1039/d3su00367a), 2024-01-01
Supplement: d3su00367a1.pdf [file d3su00367a1.pdf]

## Supporting Information

### Sustainable synthesis of diethyl carbonate from carbon dioxide and ethanol featuring acetals as regenerable dehydrating agent

Wahyu S. Putro,<sup>a</sup> Seiichiro Ijima,<sup>a</sup> Seiji Matsumoto,<sup>b</sup> Satoshi Hamura,<sup>b</sup> Mizuho Yabushita,<sup>c</sup> Keiichi Tomishige,<sup>c</sup> Norihisa Fukaya,<sup>\*a</sup> and Jun-Chul Choi<sup>\*a</sup>

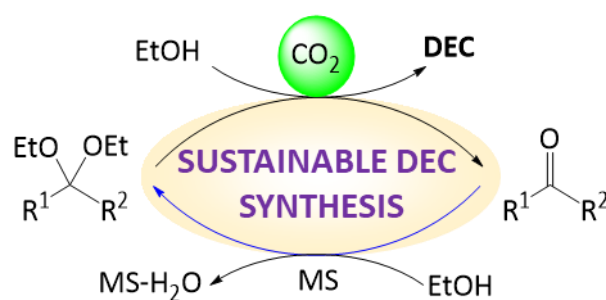

<sup>a</sup> National Institute of Advanced Industrial Science and Technology (AIST), Tsukuba Central 5, 1-1-1 Higashi, Tsukuba, 305-8565, Ibaraki, Japan.

Email: n.fukaya@aist.go.jp (N. Fukaya), and junchul.choi@aist.go.jp (J.-C. Choi)

<sup>b</sup> Tosoh Corporation, 3-8-2 Shiba, Minato-ku, Tokyo 105-8623, Japan

<sup>c</sup> Department of Applied Chemistry, School of Engineering, Tohoku University, 6-6-07, Aoba, Aramaki, Aoba-ku, Sendai, Miyagi, 980-8579, Japan

**Table S1** Investigation of optimum condition for the synthesis of DEC using Bu<sub>2</sub>SnO catalyst

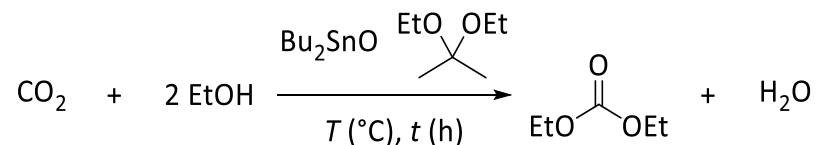

| EtOH/<br>acetal | T<br>(°C) | t (h) | EtOH<br>(mmol) | Acetal<br>(mmol) | Acetone<br>(mmol) | 2-Ethoxypropene<br>(mmol) | Mesityl oxide<br>(mmol) | DEC<br>(mmol) <sup>a</sup> | DEC<br>(%) <sup>b</sup> | DEC<br>(%) <sup>c</sup> | MB (%) <sup>d</sup> |    |    |
|-----------------|-----------|-------|----------------|------------------|-------------------|---------------------------|-------------------------|----------------------------|-------------------------|-------------------------|---------------------|----|----|
|                 |           |       |                |                  |                   |                           |                         |                            |                         |                         | ①                   | ②  | ③  |
| 2/1             | 160       | 20    | 29.4           | 14.7             | 1.90              | 0.79                      | 0.01                    | 0.48                       | 3                       | 3                       | 92                  | 98 | 98 |
| 2/1             | 180       | 20    | 29.4           | 14.8             | 2.44              | 1.54                      | 0.03                    | 0.92                       | 6                       | 6                       | 85                  | 95 | 95 |
| 4/1             | 160       | 20    | 41.9           | 10.9             | 1.99              | 0.51                      | 0.01                    | 0.85                       | 4                       | 8                       | 90                  | 95 | 95 |
| 4/1             | 180       | 20    | 41.1           | 10.6             | 2.90              | 0.70                      | 0.05                    | 1.59                       | 8                       | 15                      | 85                  | 92 | 92 |
| 10/1            | 180       | 20    | 58.5           | 5.63             | 2.03              | 0.32                      | 0.01                    | 1.33                       | 5                       | 23                      | 85                  | 90 | 90 |
| 20/1            | 180       | 20    | 66.1           | 3.09             | 1.42              | 0.10                      | 0.00                    | 0.79                       | 3                       | 26                      | 85                  | 88 | 88 |
| 20/1            | 200       | 20    | 66.2           | 3.17             | 1.47              | 0.13                      | 0.01                    | 1.03                       | 3                       | 32                      | 77                  | 81 | 81 |
| 20/1            | 200       | 48    | 65.4           | 3.22             | 1.58              | 0.09                      | 0.03                    | 1.31                       | 4                       | 41                      | 65                  | 68 | 69 |
| 20/1            | 220       | 20    | 65.9           | 3.21             | 1.42              | 0.24                      | 0.01                    | 0.83                       | 3                       | 26                      | 71                  | 79 | 79 |

*Reaction conditions:* 5 MPa CO<sub>2</sub> at room temperature, 20 mol% Bu<sub>2</sub>SnO relative to acetal. <sup>a</sup> DEC was determined by GC using *tert*-butyl toluene as internal standard. <sup>b</sup> DEC yield was calculated based on EtOH. <sup>c</sup> DEC yield was calculated based on acetal. <sup>d</sup> MB = material balance (%). ① = 100 x (remaining acetal + acetone)/initial acetal. ② = 100 x (remaining acetal + acetone + 2-ethoxypropene)/initial acetal. ③ = 100 x (remaining acetal + acetone + 2-ethoxypropene + 2 x mesityl oxide)/initial acetal

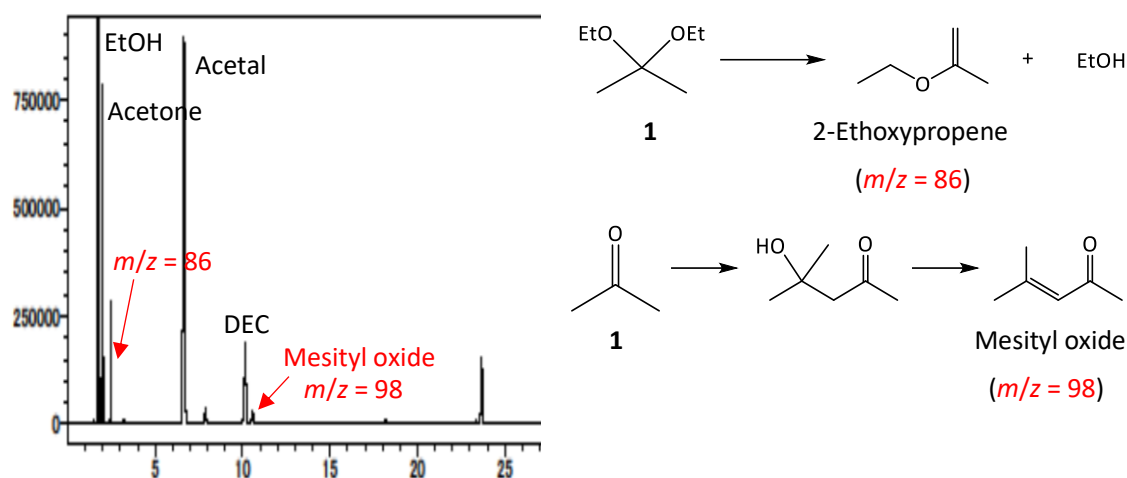

Fig. S1 GC chart of DEC synthesis using acetal **1** and the corresponding byproduct

Table S2 The effect of co-catalyst ( $\text{Sc}(\text{OTf})_3$ ) for the synthesis of DEC using  $\text{Bu}_2\text{SnO}$  catalyst

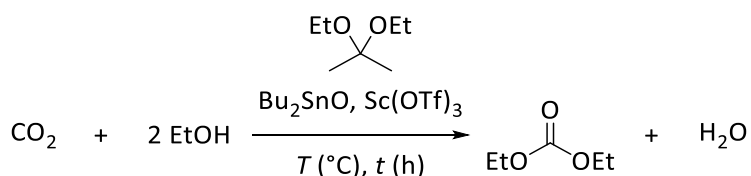

| EtOH/<br>Acetal | T<br>( $^{\circ}\text{C}$ ) | $\text{Sc}(\text{OTf})_3$<br>(mol%) | EtOH<br>(mmol) | Acetal<br>(mmol) | Acetone<br>(mmol) | DEC<br>(mmol) <sup>a</sup> | DEC<br>(%) <sup>b</sup> | DEC<br>(%) <sup>c</sup> | MB<br>(%) <sup>d</sup> |
|-----------------|-----------------------------|-------------------------------------|----------------|------------------|-------------------|----------------------------|-------------------------|-------------------------|------------------------|
| 2/1             | 160                         | —                                   | 29.4           | 14.7             | 1.90              | 0.48                       | 3                       | 3                       | 92                     |
| 2/1             | 160                         | 0.04                                | 28.9           | 14.6             | 2.86              | 1.48                       | 10                      | 10                      | 86                     |
| 2/1             | 180                         | —                                   | 29.4           | 14.8             | 2.44              | 0.92                       | 6                       | 6                       | 85                     |
| 2/1             | 180                         | 0.04                                | 29.5           | 14.6             | 3.62              | 2.57                       | 17                      | 18                      | 73                     |
| 4/1             | 160                         | —                                   | 41.9           | 10.9             | 1.99              | 0.85                       | 4                       | 8                       | 90                     |
| 4/1             | 160                         | 0.04                                | 41.8           | 10.8             | 2.90              | 1.46                       | 7                       | 14                      | 89                     |
| 4/1             | 180                         | —                                   | 41.1           | 10.6             | 2.90              | 1.59                       | 8                       | 15                      | 85                     |
| 4/1             | 180                         | 0.04                                | 42.5           | 10.7             | 3.80              | 2.84                       | 13                      | 26                      | 79                     |
| 10/1            | 180                         | —                                   | 59.0           | 5.72             | 1.44              | 0.83                       | 3                       | 14                      | 86                     |
| 10/1            | 180                         | 0.04                                | 57.9           | 5.68             | 2.12              | 1.00                       | 3                       | 18                      | 84                     |
| 10/1            | 180                         | —                                   | 58.5           | 5.63             | 2.03              | 1.33                       | 5                       | 23                      | 85                     |
| 10/1            | 180                         | 0.04                                | 59.9           | 5.99             | 2.76              | 2.15                       | 7                       | 36                      | 81                     |

Reaction conditions: 5 MPa  $\text{CO}_2$  at room temperature, 20 mol%  $\text{Bu}_2\text{SnO}$  relative to acetal, 0.04 mol%  $\text{Sc}(\text{OTf})_3$  relative to acetal amount. <sup>a</sup> DEC was determined by GC using *tert*-butyl toluene as internal standard. <sup>b</sup> DEC yield was calculated based on EtOH. <sup>c</sup> DEC yield was calculated based on acetal. <sup>d</sup> MB = material balance (%).

**Table S3** Equilibrium constant from acetal formation in anhydrous methanol and the rate constant of the acetal hydrolysis

| Ketone + 2 MeOH $\rightleftharpoons$ Acetal + H <sub>2</sub> O           |                                                          | Acetal + H <sub>2</sub> O $\rightarrow$ Ketone | DEC formation (mmol)         |                           |
|--------------------------------------------------------------------------|----------------------------------------------------------|------------------------------------------------|------------------------------|---------------------------|
| $K = [\text{Acetal}][\text{H}_2\text{O}]/[\text{Ketone}][\text{MeOH}]^2$ |                                                          | $k$ of acetal hydrolysis                       |                              |                           |
| Ketone                                                                   | $K / 10^{-3} \text{ mol} \cdot \text{L}^{-1} \text{ }^a$ | $k$ <sup>b</sup>                               | Without Sc(OTf) <sub>3</sub> | With Sc(OTf) <sub>3</sub> |
| Acetone <b>1a</b>                                                        | 0.4 ± 0.02                                               | 4.45                                           | 1.59                         | 2.84                      |
| Butanone <b>2a</b>                                                       | 0.13 ± 0.01                                              | 7.82                                           | 2.03                         | 3.12                      |
| 2-Pentanone <b>3a</b>                                                    | —                                                        | 8.97                                           | 2.42                         | 3.51                      |
| 3-Pentanone <b>4a</b>                                                    | 0.034 ± 0.002                                            | 8.89                                           | 1.74                         | 3.09                      |
| Cyclohexanone <b>5a</b>                                                  | 6.7 ± 0.4                                                | 0.67                                           | 0.21                         | 0.26                      |

<sup>a</sup>  $K$  is the equilibrium constant of acetal formation from methanol observed at 25 °C as referred from J. M. Bell, D. G. Kubler, *et al.*, *J. Org. Chem.*, 1965, **30**, 4284-4292. <sup>b</sup>  $k$  is the rate constant for acetal hydrolysis observed 25 °C referred from M. J. Huggins and D. G. Kubler, *et al.*, *J. Org. Chem.*, 1975, **40**, 2813-2815

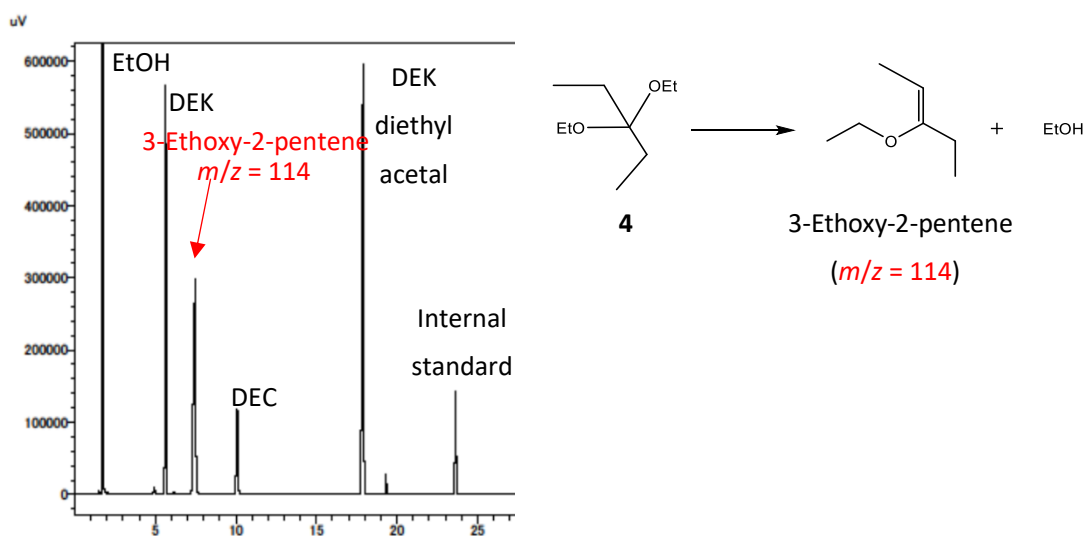

**Fig. S2** GC chart of DEC synthesis using acetal **4** and the corresponding byproduct

**Table S4** Acetal screening for the direct synthesis of DEC from CO<sub>2</sub> using Bu<sub>2</sub>SnO catalyst with or without Sc(OTf)<sub>3</sub> co-catalyst

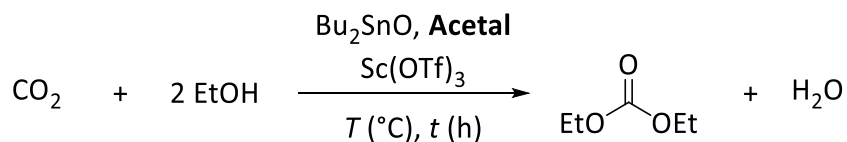

| Acetal                                                                              | Sc(OTf) <sub>3</sub><br>(mol%) | EtOH<br>(mmol) | Acetal<br>(mmol) | Ketone<br>(mmol) | DEC<br>(mmol) <sup>a</sup> | DEC<br>(%) <sup>b</sup> | DEC<br>(%) <sup>c</sup> | MB<br>(%) <sup>d</sup> |
|-------------------------------------------------------------------------------------|--------------------------------|----------------|------------------|------------------|----------------------------|-------------------------|-------------------------|------------------------|
| 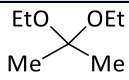   | —                              | 41.1           | 10.6             | 2.90             | 1.59                       | 8                       | 15                      | 85                     |
| <b>1</b>                                                                            | 0.04                           | 42.5           | 10.7             | 3.80             | 2.84                       | 13                      | 26                      | 79                     |
|    | —                              | 41.9           | 10.6             | 3.40             | 2.03                       | 10                      | 19                      | 80                     |
| <b>2</b>                                                                            | 0.04                           | 41.8           | 10.3             | 4.42             | 3.12                       | 15                      | 30                      | 81                     |
|    | —                              | 41.5           | 10.2             | 3.82             | 2.42                       | 12                      | 24                      | 76                     |
| <b>3</b>                                                                            | 0.04                           | 42.4           | 10.4             | 4.89             | 3.51                       | 17                      | 34                      | 75                     |
|   | —                              | 42.5           | 10.6             | 3.77             | 1.74                       | 8                       | 16                      | 70                     |
| <b>4</b>                                                                            | 0.04                           | 42.2           | 10.8             | 4.61             | 3.09                       | 15                      | 29                      | 67                     |
|  | —                              | 41.7           | 10.6             | 3.36             | 0.21                       | 1                       | 2                       | 72                     |
| <b>5</b>                                                                            | 0.04                           | 42.2           | 10.7             | 2.25             | 0.26                       | 1                       | 2                       | 37                     |

*Reaction conditions:* 5 MPa CO<sub>2</sub> at room temperature, 40 mmol EtOH, 10 mmol acetal, 20 mol% Bu<sub>2</sub>SnO relative to acetal, 0.04 mol% Sc(OTf)<sub>3</sub> relative to acetal, 180 °C, 20 h. <sup>a</sup> Percentage is DEC yield determined by GC using *tert*-butyl toluene as internal standard. <sup>b</sup> DEC yield was calculated based on EtOH. <sup>c</sup> DEC yield was calculated based on acetal. <sup>d</sup> MB = Material balance (%).

**Table S5** The effect of EtOH/acetone ratio on the synthesis of acetal from acetone

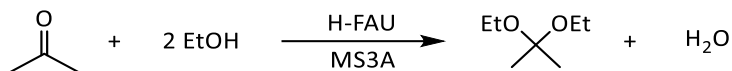

| EtOH / Acetone | Acetone (mmol) | Ethanol (mmol) | Acetal (mmol) | Acetal (%)      | Conv. (%) | MB (%) <sup>c</sup> | H <sub>2</sub> O (%) <sup>d</sup> | Adsorbed H <sub>2</sub> O (%) <sup>e</sup> |
|----------------|----------------|----------------|---------------|-----------------|-----------|---------------------|-----------------------------------|--------------------------------------------|
| 0.1/0.2        | 154.3          | 41.3           | 21.8          | 44 <sup>a</sup> | 23        | 88                  | 0.015                             | 99                                         |
| 0.1/0.1        | 65.9           | 41.1           | 22.1          | 44 <sup>a</sup> | 34        | 88                  | 0.034                             | 99                                         |
| 0.2/0.1        | 48.7           | 92.8           | 40.1          | 40 <sup>b</sup> | 51        | 89                  | 0.038                             | 99                                         |
| 0.4/0.1        | 46.0           | 282.9          | 46.1          | 46 <sup>b</sup> | 51        | 92                  | 0.047                             | 99                                         |
| 0.6/0.1        | 43.6           | 464.8          | 48.1          | 48 <sup>b</sup> | 56        | 92                  | 0.055                             | 98                                         |
| 1.0/0.1        | 44.3           | 890.8          | 49.6          | 50 <sup>b</sup> | 56        | 94                  | 0.064                             | 95                                         |
| 1.5/0.1        | 42.2           | 1354.3         | 50.7          | 51 <sup>b</sup> | 58        | 93                  | 0.085                             | 96                                         |

Reaction conditions: 1.275 g H-FAU, 10 g MS3A, 1 h, ambient conditions. <sup>a</sup> Yield based on EtOH, and <sup>b</sup> yield based on acetone was determined by GC using *tert*-butyl toluene as an internal standard. <sup>c</sup> Material balance. <sup>d</sup> H<sub>2</sub>O content was determined by Karl-Fischer titration. <sup>e</sup> H<sub>2</sub>O adsorbed by MS.

|                                                                                                                                                  |                                                                                      |
|--------------------------------------------------------------------------------------------------------------------------------------------------|--------------------------------------------------------------------------------------|
| $\text{CH}_3\text{C}(\text{OEt})_2 \xrightarrow[1 \text{ h, r.t.}]{\text{H-FAU}}$                                                                | $\text{CH}_3\text{COCH}_3 \xrightarrow[1 \text{ h, r.t.}]{\text{H-FAU}}$             |
|                                                               |  |
| H-FAU catalyst after exposed by acetal                                                                                                           | H-FAU after exposed by acetone                                                       |
| $\text{CH}_3\text{COCH}_3 + 2 \text{EtOH} \xrightarrow[\text{MS3A}]{\text{H-FAU-acetal}} \text{CH}_3\text{C}(\text{OEt})_2 + \text{H}_2\text{O}$ | <b>Yield of acetal = 3%</b>                                                          |

**Fig. S3** The photograph of H-FAU catalyst after exposed by acetal and acetone and its catalytic activity for formation of acetal

**Table S6** The effect of acetal addition on time profile results of the synthesis of acetal from acetone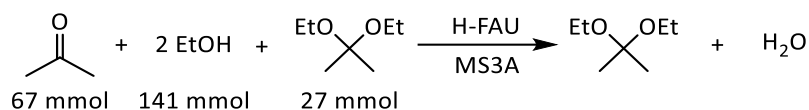

| Reaction time (h) | Acetone (mmol) | Ethanol (mmol) | Acetal (mmol) | Acetal (%) <sup>a</sup> | Acetal difference (%) | MB (%) <sup>b</sup> |
|-------------------|----------------|----------------|---------------|-------------------------|-----------------------|---------------------|
| Start             | 67.2           | 1410           | 27.9          | 28                      | –                     | –                   |
| 1                 | 53.9           | 1369           | 38            | 38                      | 10                    | 95                  |
| 2                 | 51.9           | 1361           | 37            | 37                      | 9                     | 91                  |
| 3                 | 53.2           | 1362           | 38            | 38                      | 10                    | 94                  |
| 18                | 53.2           | 1329           | 38            | 38                      | 10                    | 96                  |
| 20                | 50.8           | 1351           | 37            | 37                      | 9                     | 94                  |

*Reaction conditions:* 0.067 mol acetone, 1.41 mol ethanol, 0.027 mol 2,2-ethoxypropane, 10 g MS3A, 0.85 g H-FAU, ambient conditions. <sup>a</sup> Yield based on acetone was determined by GC using *tert*-butyl toluene as an internal standard. <sup>b</sup> MB = Material balance (%).

**Table S7** The effect of acetal addition with acetal-pretreated catalyst on time profile results of the synthesis of acetal from acetone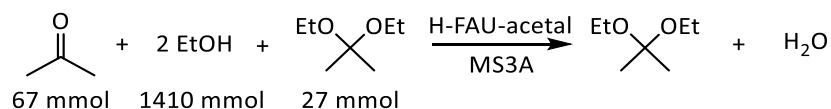

| Reaction time (h) | Acetone (mmol) | Ethanol (mmol) | Acetal (mmol) | Acetal (%) <sup>a</sup> | Acetal difference (%) | MB (%) <sup>b</sup> |
|-------------------|----------------|----------------|---------------|-------------------------|-----------------------|---------------------|
| Start             | 67.2           | 1413           | 27            | 27                      | –                     | –                   |
| 1                 | 78.8           | 1415           | 17            | 17                      | -10                   | 102                 |
| 2                 | 63.5           | 1369           | 24            | 24                      | -3                    | 93                  |
| 3                 | 65.7           | 1393           | 24            | 24                      | -3                    | 95                  |
| 90                | 68.3           | 1423           | 23            | 23                      | -4                    | 95                  |

*Reaction conditions:* 0.067 mol acetone, 1.41 mol ethanol, 0.027 mol 2,2-ethoxypropane, 10 g MS3A, 0.85 g H-FAU exposed by acetal (H-FAU-acetal), ambient conditions. <sup>a</sup> Yield based on acetone was determined by GC using *tert*-butyl toluene as an internal standard. <sup>b</sup> MB = Material balance (%).

**Table S8** The effect of MS amount on the synthesis of acetal from acetone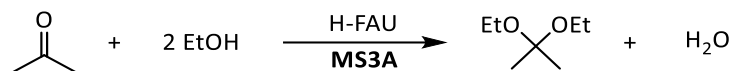

| MS3A (g) | Acetone (mmol) | Ethanol (mmol) | Acetal (mmol) | Acetal (%) <sup>a</sup> | Conv. (%) | MB (%) <sup>b</sup> | H <sub>2</sub> O (%) <sup>c</sup> | Adsorbed H <sub>2</sub> O (%) <sup>d</sup> |
|----------|----------------|----------------|---------------|-------------------------|-----------|---------------------|-----------------------------------|--------------------------------------------|
| 5        | 64.0           | 322.9          | 27.6          | 28                      | 36        | 92                  | 0.218                             | 89                                         |
| 7        | 55.4           | 300.2          | 36.6          | 37                      | 45        | 89                  | 0.176                             | 93                                         |
| 8        | 51.8           | 292.8          | 41.3          | 41                      | 48        | 93                  | 0.056                             | 98                                         |
| 10       | 46.0           | 282.9          | 46.1          | 46                      | 51        | 92                  | 0.047                             | 99                                         |
| 12       | 40.0           | 262.2          | 48.1          | 48                      | 60        | 88                  | 0.032                             | 99                                         |

*Reaction conditions:* 0.1 mol acetone, 0.4 mol ethanol, 1.275 g H-FAU, 1 h, ambient conditions. <sup>a</sup> Yield based on acetone was determined by GC using *tert*-butyl toluene as an internal standard. <sup>b</sup> Material balance. <sup>c</sup> H<sub>2</sub>O content was determined by Karl-Fischer titration. <sup>d</sup> H<sub>2</sub>O adsorbed by MS.

**Table S9** Catalyst screening for the synthesis of acetal from acetone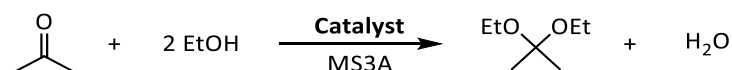

| Catalyst  | Acetone (mmol) | Ethanol (mmol) | Acetal (mmol) | Acetal Yield (%) <sup>a</sup> | Conv. (%) | MB (%) <sup>b</sup> | H <sub>2</sub> O (%) <sup>c</sup> |
|-----------|----------------|----------------|---------------|-------------------------------|-----------|---------------------|-----------------------------------|
| H-FAU     | 46.0           | 282.9          | 46.1          | 46                            | 54        | 92                  | 0.047                             |
| SZ        | 71.1           | 326.8          | 27.3          | 27                            | 60        | 90                  | 0.041                             |
| Dowex     | 26.6           | 271.0          | 26.6          | 27                            | 44        | 82                  | 0.132                             |
| Nafion    | 56.1           | 284.8          | 40.6          | 41                            | 44        | 97                  | 0.098                             |
| Amberlyst | 49.8           | 282.5          | 45.3          | 45                            | 50        | 95                  | 0.062                             |

*Reaction conditions:* 0.1 mol acetone, 0.4 mol ethanol, 10 g MS3A, 0.09 mmol H<sup>+</sup>, H-FAU → 1 h, SO<sub>4</sub><sup>2-</sup>/ZrO<sub>2</sub>, Dowex → 2 h, Nafion → 3 h, and Amberlyst → 2 h, ambient conditions. <sup>a</sup> Yield based on acetone was determined by GC using *tert*-butyl toluene as an internal standard. <sup>b</sup> MB = Material balance (%). <sup>c</sup> H<sub>2</sub>O content was determined by Karl-Fischer titration.



**Table S10** Catalyst screening for the synthesis of acetal from acetone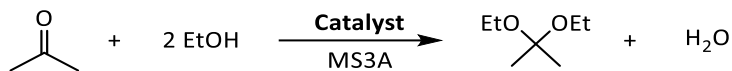

| Catalyst  | Acetone (mmol) | Ethanol (mmol) | Acetal (mmol) | Acetal Yield (%) <sup>a</sup> | Conv. (%) | MB (%) <sup>b</sup> | H <sub>2</sub> O (%) <sup>c</sup> |
|-----------|----------------|----------------|---------------|-------------------------------|-----------|---------------------|-----------------------------------|
| H-FAU     | 46.0           | 282.9          | 46.1          | 46                            | 54        | 92                  | 0.047                             |
| SZ        | 71.1           | 326.8          | 27.3          | 27                            | 60        | 90                  | 0.041                             |
| Dowex     | 26.6           | 271.0          | 26.6          | 27                            | 44        | 82                  | 0.132                             |
| Nafion    | 56.1           | 284.8          | 40.6          | 41                            | 44        | 97                  | 0.098                             |
| Amberlyst | 49.8           | 282.5          | 45.3          | 45                            | 50        | 95                  | 0.062                             |

*Reaction conditions:* 0.1 mol acetone, 0.4 mol ethanol, 10 g MS3A, 0.09 mmol H<sup>+</sup>, H-FAU → 1 h, SO<sub>4</sub><sup>2-</sup>/ZrO<sub>2</sub>, Dowex → 2 h, Nafion → 3 h, and Amberlyst → 2 h, ambient conditions. <sup>a</sup> Yield based on acetone was determined by GC using *tert*-butyl toluene as an internal standard. <sup>b</sup> MB = Material balance (%). <sup>c</sup> H<sub>2</sub>O content was determined by Karl-Fischer titration.

**Table S11** Proton amount and chemical structure of the used ion exchange resins

| Catalyst     | H <sup>+</sup> (mmol/g) | Chemical structure                                                                   |
|--------------|-------------------------|--------------------------------------------------------------------------------------|
| Dowex 50Wx2  | 0.6                     | 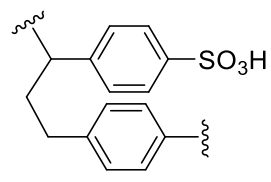 |
| Nafion-NR50  | 0.8                     |  |
| Amberlyst-15 | 4.7                     |  |

**Table S12** Synthesis of acetal from acetone using Amberlyst catalyst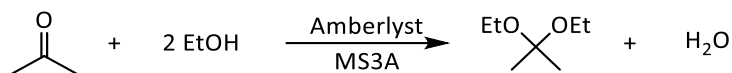

| Time (h) | Acetone (mmol) | Ethanol (mmol) | Acetal (mmol) | Acetal yield (%) <sup>a</sup> | Conversion (%) | MB (%) <sup>b</sup> |
|----------|----------------|----------------|---------------|-------------------------------|----------------|---------------------|
| 1        | 53.8           | 294.5          | 42.3          | 42                            | 46             | 96                  |
| 2        | 49.8           | 282.5          | 45.3          | 45                            | 50             | 95                  |
| 3        | 54.8           | 288.4          | 40.0          | 40                            | 45             | 95                  |
| 4        | 54.8           | 288.9          | 36.6          | 37                            | 45             | 91                  |
| 5        | 58.2           | 294.5          | 34.6          | 35                            | 42             | 93                  |
| 22       | 57.3           | 288.7          | 27.2          | 27                            | 43             | 85                  |
| 24       | 58.8           | 289.5          | 27.6          | 28                            | 41             | 86                  |

*Reaction conditions:* 0.1 mol acetone, 0.4 mol ethanol, 10 g MS3A, 0.2 g Amberlyst, ambient conditions. <sup>a</sup> Yield based on acetone was determined by GC using *tert*-butyl toluene as an internal standard. <sup>b</sup> MB = Material balance (%). H<sub>2</sub>O content determined by Karl-Fischer titration was 0.004% (at 0 h) → 0.062% (24 h).

**Table S13** Synthesis of acetal from methyl ethyl ketone (MEK) using Amberlyst catalyst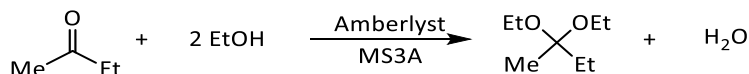

| Time (h) | MEK (mmol) | Ethanol (mmol) | Acetal (mmol) | Acetal yield (%) <sup>a</sup> | Conversion (%) | MB (%) <sup>b</sup> |
|----------|------------|----------------|---------------|-------------------------------|----------------|---------------------|
| 1        | 71.7       | 284.5          | 34.6          | 35                            | 28             | 106                 |
| 2        | 62.1       | 260.7          | 43.8          | 44                            | 38             | 106                 |
| 3        | 59.4       | 250.9          | 46.3          | 46                            | 41             | 106                 |
| 5        | 63.9       | 255.8          | 41.7          | 42                            | 36             | 106                 |
| 22       | 70.5       | 261.0          | 30.1          | 30                            | 29             | 101                 |
| 24       | 69.7       | 257.9          | 30.3          | 30                            | 30             | 100                 |

*Reaction conditions:* 0.1 mol MEK, 0.4 mol ethanol, 10 g MS3A, 0.2 g Amberlyst, ambient conditions. <sup>a</sup> Yield based on acetone determined by GC using *tert*-butyl toluene as an internal standard. <sup>b</sup> MB = Material balance (%). H<sub>2</sub>O content determined by Karl-Fischer titration was 0.004% (0 h) → 0.043% (24 h).

**Table S14** Synthesis of acetal from methyl propyl ketone (MPK) using Amberlyst catalyst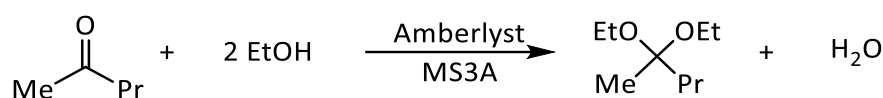

| Time (h) | MPK (mmol) | Ethanol (mmol) | Acetal (mmol) | Acetal yield (%) <sup>a</sup> | Conversion (%) | MB (%) <sup>b</sup> |
|----------|------------|----------------|---------------|-------------------------------|----------------|---------------------|
| 1        | 71.1       | 322.3          | 32.3          | 32                            | 29             | 103                 |
| 2        | 67.7       | 312.9          | 37.7          | 38                            | 32             | 105                 |
| 3        | 66.0       | 298.2          | 36.8          | 37                            | 34             | 103                 |
| 5        | 70.0       | 302.7          | 32.6          | 33                            | 30             | 103                 |
| 22       | 75.4       | 304.4          | 24.3          | 24                            | 25             | 100                 |
| 24       | 75.7       | 304.3          | 24.3          | 24                            | 24             | 100                 |

*Reaction conditions:* 0.1 mol methyl propyl ketone, 0.4 mol ethanol, 10 g MS3A, 0.2 g Amberlyst, ambient conditions. <sup>a</sup> Yield based on acetone was determined by GC using *tert*-butyl toluene as an internal standard. <sup>b</sup> MB = Material balance (%). H<sub>2</sub>O content determined by Karl-Fischer titration was 0.004% (at 0 h) → 0.030% (24 h).

**Table S15** Synthesis of acetal from diethyl ketone using Amberlyst catalyst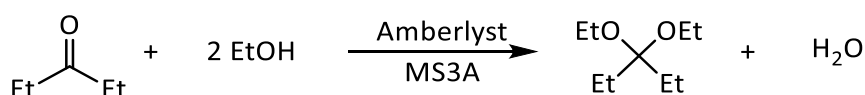

| Time (h) | Diethyl ketone (mmol) | Ethanol (mmol) | Acetal (mmol) | Acetal yield (%) <sup>a</sup> | Conversion (%) | MB (%) <sup>b</sup> |
|----------|-----------------------|----------------|---------------|-------------------------------|----------------|---------------------|
| 1        | 44.8                  | 178.6          | 5.8           | 12                            | 10             | 101                 |
| 2        | 42.1                  | 168.8          | 8.0           | 16                            | 16             | 100                 |
| 3        | 41.1                  | 164.7          | 9.1           | 18                            | 18             | 100                 |
| 5        | 40.1                  | 158.8          | 9.7           | 19                            | 20             | 100                 |
| 22       | 39.5                  | 153.8          | 9.7           | 19                            | 21             | 98                  |
| 24       | 39.2                  | 152.7          | 9.7           | 19                            | 22             | 98                  |

*Reaction conditions:* 0.05 mol diethyl ketone, 0.2 mol ethanol, 5 g MS3A, 0.1 g Amberlyst, ambient conditions. <sup>a</sup> Yield based on acetone was determined by GC using *tert*-butyl toluene as an internal standard. <sup>b</sup> MB = Material balance (%). H<sub>2</sub>O content determined by Karl-Fischer titration was 0.004% (at 0 h) → 0.020% (24 h).



| Amberlyst |      |      |       |      |    |     |       |
|-----------|------|------|-------|------|----|-----|-------|
| 1         | 1    | 51.5 | 271.6 | 46.7 | 47 | 98  | 0.028 |
| 2         | 0.89 | 47.3 | 245.7 | 40.5 | 45 | 99  | 0.028 |
| 3         | 0.76 | 38.5 | 207.3 | 36.5 | 48 | 99  | 0.033 |
| 4         | 0.30 | 14.9 | 84.7  | 15.3 | 50 | 101 | 0.042 |
| 5         | 0.13 | 6.3  | 33.4  | 5.3  | 42 | 99  | 0.040 |

Reaction conditions: 0.1 mol acetone, 0.4 mol ethanol, 10 g MS3A, H-FAU  $\rightarrow$  1.275 g, Nafion  $\rightarrow$  5.1 g, and Amberlyst  $\rightarrow$  0.2 g, 2 h, ambient conditions. <sup>a</sup> Yield based on acetone was determined by GC using *tert*-butyl toluene as an internal standard. <sup>b</sup> MB = Material balance (%). <sup>c</sup> H<sub>2</sub>O content was determined by Karl-Fischer titration.

**Table S18** Results of catalytic reusability on acetal synthesis using SpinChem method

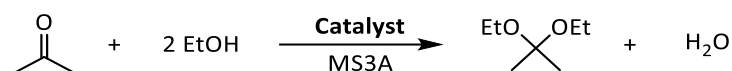

| Run       | Reaction scale | Acetone (mmol) | Ethanol (mmol) | Acetal (mmol) | Acetal yield (%) <sup>a</sup> | MB (%) <sup>b</sup> | H <sub>2</sub> O content (%) <sup>c</sup> |
|-----------|----------------|----------------|----------------|---------------|-------------------------------|---------------------|-------------------------------------------|
| H-FAU     |                |                |                |               |                               |                     |                                           |
| 1         | 1              | 55.1           | 346.7          | 27.2          | 27                            | 82                  | 0.089                                     |
| 2         | 0.89           | 53.3           | 312.6          | 22.3          | 25                            | 85                  | 0.165                                     |
| 3         | 0.70           | 39.5           | 243.3          | 19.0          | 27                            | 84                  | 0.280                                     |
| 4         | 0.61           | 26.1           | 223.1          | 15.7          | 26                            | 83                  | 0.367                                     |
| 5         | 0.53           | 36.7           | 193.1          | 5.9           | 11                            | 81                  | 0.236                                     |
| Nafion    |                |                |                |               |                               |                     |                                           |
| 1         | 1              | 73.7           | 371.2          | 19.8          | 20                            | 94                  | 0.080                                     |
| 2         | 1              | 56.4           | 318.4          | 25.0          | 25                            | 81                  | 0.062                                     |
| 3         | 1              | 59.9           | 341.1          | 25.0          | 25                            | 85                  | 0.075                                     |
| 4         | 1              | 61.3           | 345.4          | 26.3          | 26                            | 88                  | 0.052                                     |
| 5         | 1              | 58.2           | 334.9          | 29.4          | 29                            | 88                  | 0.047                                     |
| Amberlyst |                |                |                |               |                               |                     |                                           |
| 1         | 1              | 55.2           | 340.1          | 30.8          | 31                            | 86                  | 0.049                                     |
| 2         | 1              | 61.9           | 332.9          | 33.9          | 34                            | 96                  | 0.047                                     |
| 3         | 1              | 61.0           | 331.2          | 35.9          | 36                            | 97                  | 0.067                                     |
| 4         | 1              | 61.2           | 334.6          | 36.6          | 37                            | 98                  | 0.062                                     |

|   |   |      |       |      |    |    |       |
|---|---|------|-------|------|----|----|-------|
| 5 | 1 | 63.4 | 338.4 | 35.2 | 35 | 99 | 0.067 |
|---|---|------|-------|------|----|----|-------|

Reaction conditions: 0.1 mol acetone, 0.4 mol ethanol, 10 g MS3A, H-FAU  $\rightarrow$  1.275 g, Nafion  $\rightarrow$  5.1 g, and Amberlyst  $\rightarrow$  1.0 g, 24 h, ambient conditions. <sup>a</sup> Yield based on acetone was determined by GC using *tert*-butyl toluene as an internal standard. <sup>b</sup> MB = Material balance (%). <sup>c</sup> H<sub>2</sub>O content was determined by Karl-Fischer titration.

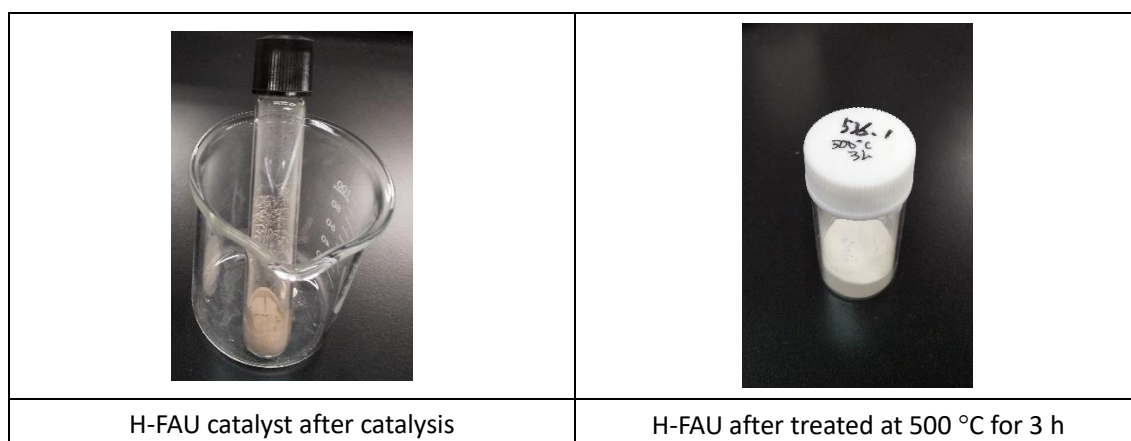

Fig. S4 The photograph of used catalyst and its appearance after heating treatment at 500 °C.

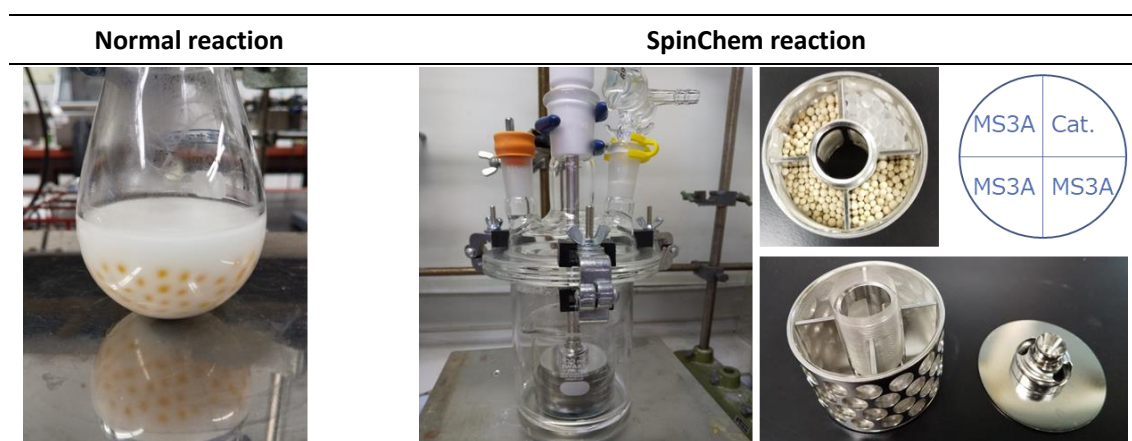

Fig. S5 The photograph of normal and SpinChem reactor system

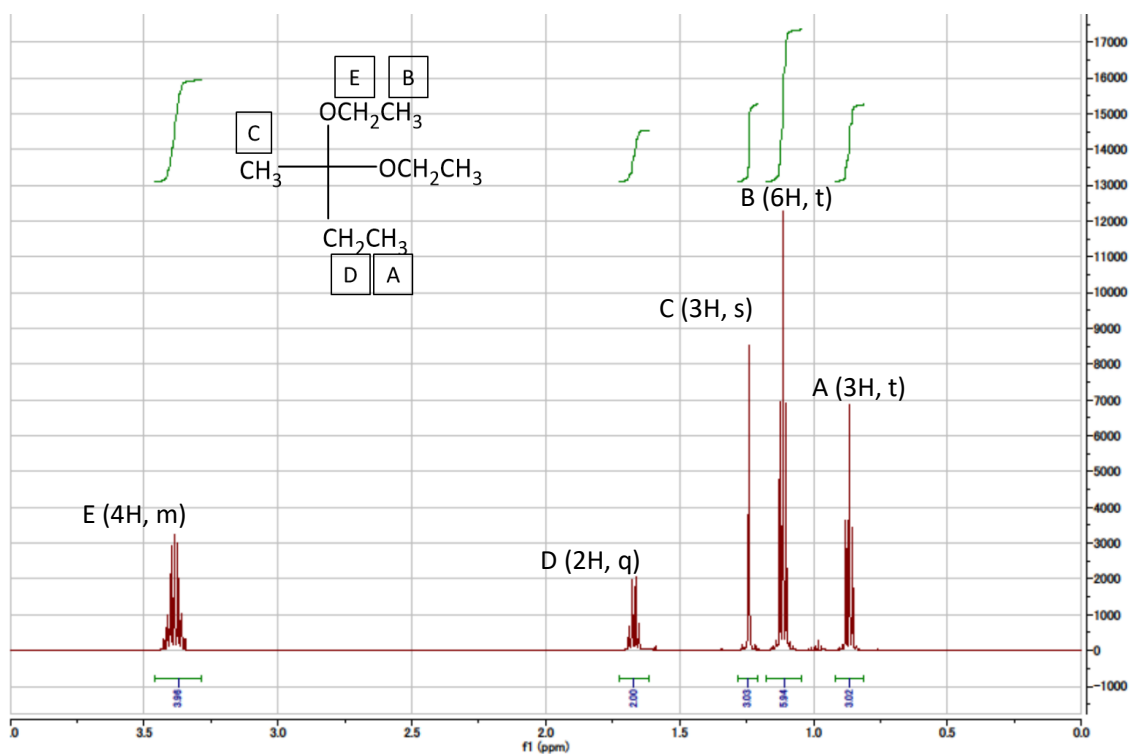

Fig. S6 <sup>1</sup>H NMR of acetal 2 synthesized from 2a

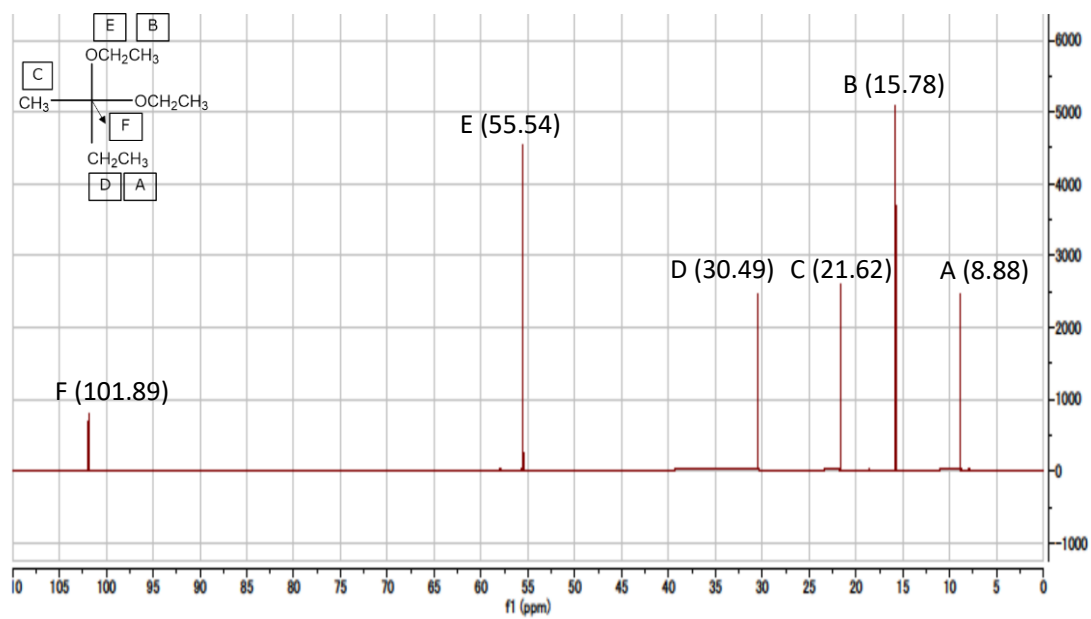

Fig. S7 <sup>13</sup>C{<sup>1</sup>H} NMR of acetal 2 synthesized from 2a

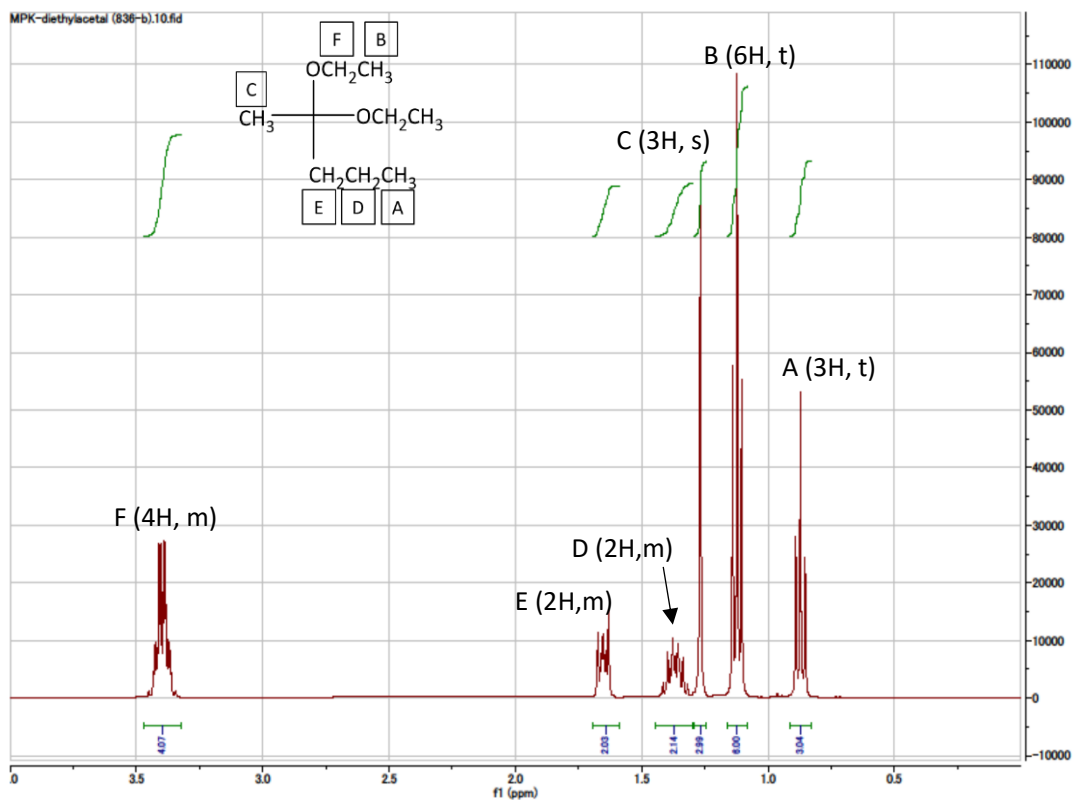

Fig. S8 <sup>1</sup>H NMR of acetal **3** synthesized from **3a**

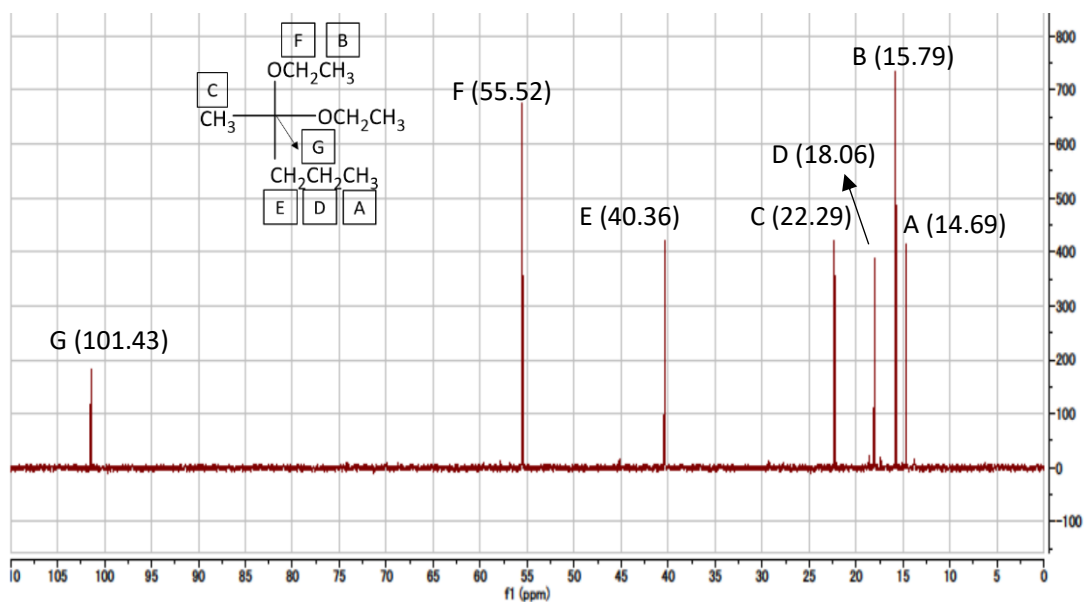

Fig. S9 <sup>13</sup>C{<sup>1</sup>H} NMR of acetal **3** synthesized from **3a**



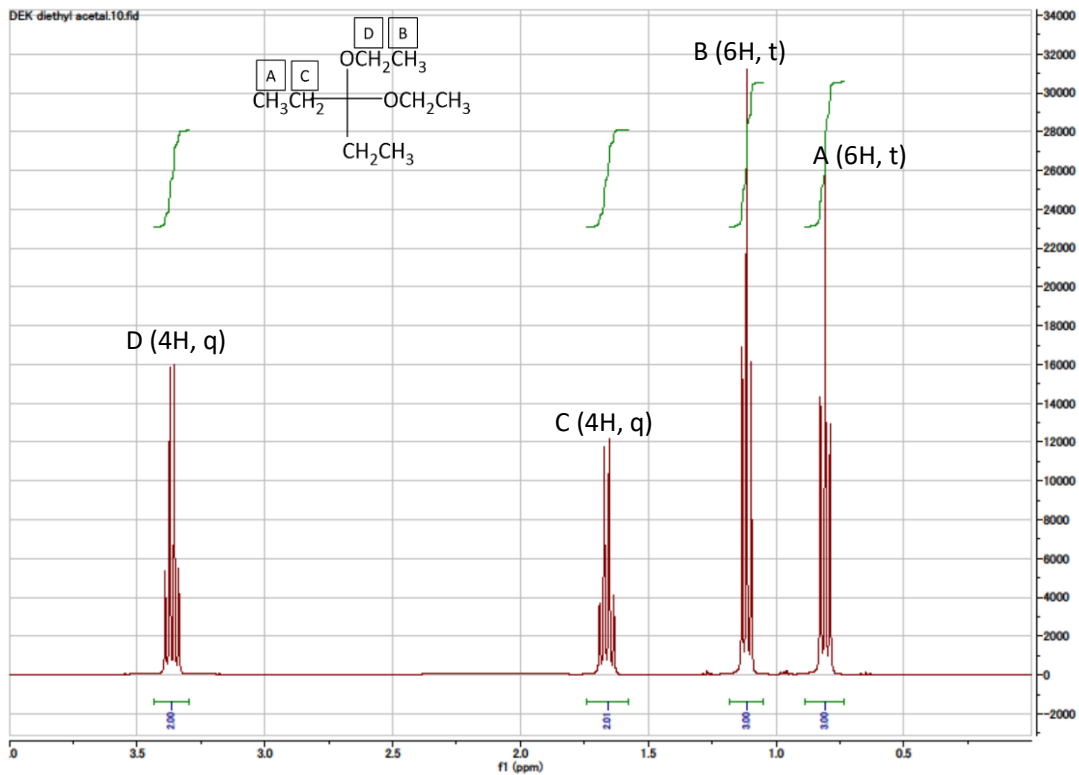

Fig. S10 <sup>1</sup>H NMR of acetal 4 synthesized from 4a

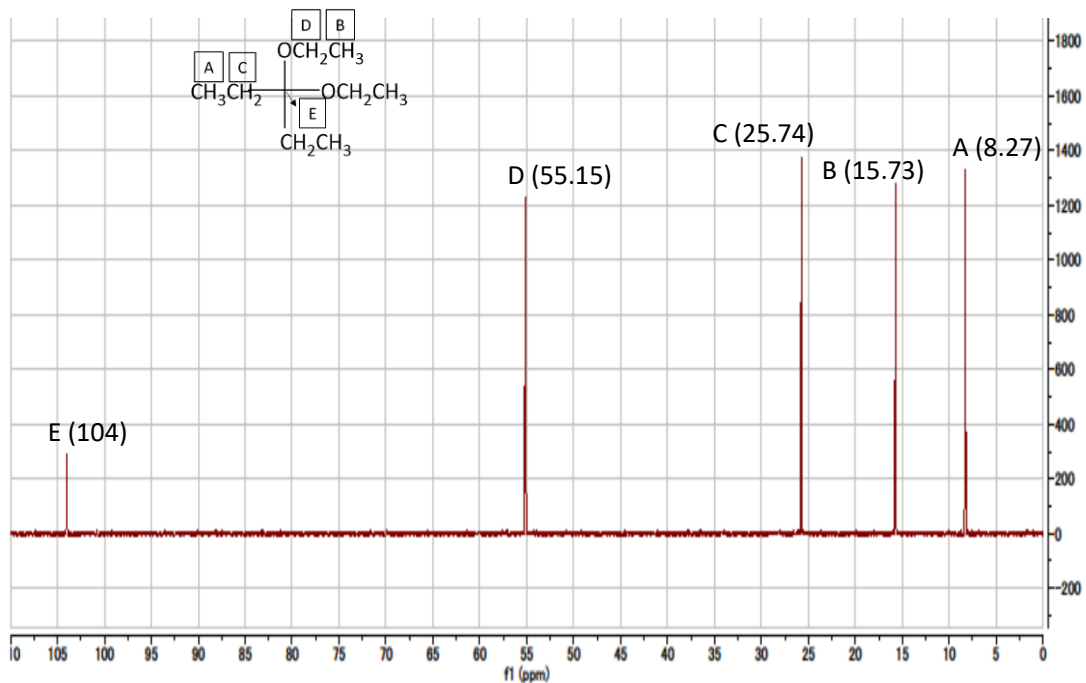

Fig. S11 <sup>13</sup>C{<sup>1</sup>H} NMR of acetal 4 synthesized from 4a

**Table S19.** Comparison of the direct synthesis of DEC based on previous reports and present work

| No | Catalyst             | Co-catalyst          | Reaction condition              |                       |       |          | DEC (mmol) | Yield (%) | Ref.      |
|----|----------------------|----------------------|---------------------------------|-----------------------|-------|----------|------------|-----------|-----------|
|    |                      |                      | Dehydrating agent or reactant   | CO <sub>2</sub> (MPa) | T (K) | Time (h) |            |           |           |
| 1  | Bu <sub>2</sub> SnO  | –                    | –                               | 5                     | 433   | 24       | n.d.       | n.d.      | This work |
| 2  | Bu <sub>2</sub> SnO  | Sc(OTf) <sub>3</sub> | –                               | 5                     | 433   | 24       | n.d.       | n.d.      | This work |
| 3  | –                    | –                    | 2,2-diethoxypropane             | 5                     | 433   | 24       | 0.01       | 0.1       | This work |
| 4  | –                    | Sc(OTf) <sub>3</sub> | 2,2-diethoxypropane             | 5                     | 433   | 24       | 0.12       | 1.1       | This work |
| 5  | Bu <sub>2</sub> SnO  | –                    | 2,2-diethoxypropane             | 5                     | 433   | 24       | 1.59       | 15        | This work |
| 6  | Bu <sub>2</sub> SnO  | Sc(OTf) <sub>3</sub> | 2,2-diethoxypropane             | 5                     | 433   | 24       | 2.84       | 26        | This work |
| 7  | Bu <sub>2</sub> SnO  | –                    | Tetraethyl orthosilicate (TEOS) | 5                     | 453   | 24       | 2.1        | 40        | S1        |
| 8  | Bu <sub>2</sub> SnO  | –                    | Triethyl orthoacetate           | 5                     | 453   | 24       | 7.8        | 68        | S1        |
| 9  | Zr(OEt) <sub>4</sub> | –                    | Tetraethyl orthosilicate (TEOS) | 5                     | 453   | 20       | 3.8        | 48        | S2        |
| 10 | CeO <sub>2</sub>     | –                    | 2,2-diethoxypropane             | 5                     | 393   | 4        | 0.8        | 4         | S3        |
| 11 | CeO <sub>2</sub>     | H-FAU                | 2,2-diethoxypropane             | 5                     | 393   | 4        | 13.1       | 62        | S3        |
| 12 | CeO <sub>2</sub>     | –                    | Triethyl orthoacetate           | 5                     | 433   | 24       | 6.3        | 64        | S4        |
| 13 | CeO <sub>2</sub>     | –                    | 2-cyanopyridine                 | 5                     | 393   | 24       | 9.1        | 91        | S5        |

**Reference**

- S1 W. S. Putro, Y. Munakata, S. Shigeyasu, S. Hamur, S. Matsumoto, J. C. Choi and N. Fukaya, *Mendeleev Commun.*, 2022, **32**, 54–56.
- S2 W. S. Putro, A. Ikeda, S. Shigeyasu, S. Hamura, S. Matsumoto, V. Y. Lee, J.-C. Choi and N. Fukaya, *ChemSusChem*, 2020, **14**, 842–846.
- S3 T. Chang, M. Tamura, Y. Nakagawa, N. Fukaya, J.-C. Choi, T. Mishima, S. Matsumoto, S. Hamura and K. Tomishige, *Green Chem.*, 2020, **22**, 7321–7327.
- S4 W. S. Putro, Y. Munakata, S. Ijima, S. Shigeyasu, S. Hamura, S. Matsumoto, T. Mishima, K. Tomishige, J.-C. Choi and N. Fukaya, *J. CO<sub>2</sub> Util.*, 2022, **55**, 101818.
- S5 M. Honda, M. Tamura, Y. Nakagawa, K. Nakao, K. Suzuki and K. Tomishige, *J. Catal.*, 2014, **318**, 95–107.
